# Supplementary material for: Tacedinaline (CI-994), a class I HDAC inhibitor, targets intrinsic tumor growth and leptomeningeal dissemination in MYC-driven medulloblastoma while making them susceptible to anti-CD47-induced macrophage phagocytosis via NF-kB-TGM2 driven tumor inflammation
Source: PubMed Central journal article supplement — J Immunother Cancer. 2023 Jan 10;11(1):e005871. doi: 10.1136/jitc-2022-005871 (PMC9843227; doi:10.1136/jitc-2022-005871), 2023-01-10
Supplement: jitc-2022-005871supp001.pdf [file jitc-2022-005871supp001.pdf]

**Supplementary Table 1:** List of cell line models used for drug screening.

| Cell line    | Entity | p53 status | MYC status                                    | Reference   |
|--------------|--------|------------|-----------------------------------------------|-------------|
| CHLA-01-MED  | MB     | wt (1)     | MYC amplification (1)                         | (1)         |
| CHLA-01R-MED | MB     | wt (1)     | MYC amplification (1)                         | (1)         |
| D283 MED     | MB     | wt (2)     | No MYC amplification (3), high-level gain (4) | (5)         |
| D341 MED     | MB     | wt (2, 6)  | MYC amplification (7)                         | (7)         |
| D425 MED     | MB     | m(8)       | MYC amplification (3), MYCN amplification (8) | (3)         |
| MED8A        | MB     | wt (8)     | PVT1-MYC fusion (9), MYC amplification (10)   | (11)        |
| MB3W1        | MB     | -          | MYC amplification (12)                        | (12)        |
| MB002        | MB     | -          | MYC amplification (13)                        | (13)        |
| HD-MB03      | MB     | wt (14)    | MYC amplification (14)                        | (14)        |
| CHLA-259     | MB     | wt (15)    | High MYCN expression (16)                     | (15)        |
| Daoy         | MB     | m (8)      | High MYCN expression (15)                     | (17)        |
| ONS76        | MB     | wt (8)     | -                                             | (18)        |
| UW-228-2     | MB     | m (6, 8)   | -                                             | (19)        |
| UW-228-3     | MB     | m (6, 8)   | -                                             | (19)        |
| ATRT13808    | AT/RT  | -          | -                                             | unpublished |
| BT-12        | AT/RT  | -          | -                                             | (20)        |
| BT-16        | AT/RT  | -          | -                                             | (20)        |
| CHLA-02-ATRT | AT/RT  | -          | -                                             | (21)        |
| CHLA-04-ATRT | AT/RT  | -          | -                                             | (21)        |
| CHLA-05-ATRT | AT/RT  | -          | -                                             | (16)        |
| CHLA-06-ATRT | AT/RT  | -          | -                                             | (16)        |
| CHLA-266     | AT/RT  | -          | -                                             | (15)        |
| HHU-ATRT-01  | AT/RT  | -          | -                                             | unpublished |
| JC-ATRT      | AT/RT  | -          | -                                             | unpublished |
| VU397        | AT/RT  | -          | -                                             | unpublished |
| AM-38        | GBM    | -          | -                                             | (22)        |
| LN-18        | GBM    | -          | -                                             | (23)        |
| LN-308       | GBM    | -          | -                                             | (24)        |
| LN-229       | GBM    | -          | -                                             | (23)        |
| SJ-GBM2      | GBM    | -          | -                                             | (25)        |
| T98G         | GBM    | -          | -                                             | (26)        |
| TP365MG      | GBM    | -          | -                                             | (27)        |
| U138MG       | GBM    | -          | -                                             | (28)        |
| U251MG       | GBM    | -          | -                                             | (29)        |
| U87MG        | GBM    | -          | -                                             | (29)        |
| YH-13        | GBM    | -          | -                                             | (22)        |

**Supplementary references**

- 1 Xu J, Margol AS, Shukla A, Ren X, Finlay JL, Krieger MD, et al. Disseminated Medulloblastoma in a Child with Germline BRCA2 6174delT Mutation and without Fanconi Anemia. *Frontiers in Oncology* 2015; 5: 191.
- 2 Saylors RL, III, Brodeur GM, Bigner DD. Infrequent p53 Gene Mutations in Medulloblastomas. *Cancer Research* 1991; 51: 4721-23.
- 3 Bigner SH, Friedman HS, Vogelstein B, Oakes WJ, Bigner DD. Amplification of the *c-myc* Gene in Human Medulloblastoma Cell Lines and Xenografts. *Cancer Research* 1990; 50: 2347-50.
- 4 Siu IM, Lal A, Blankenship JR, Aldosari N, Riggins GJ. *c-Myc* Promoter Activation in Medulloblastoma. *Cancer Research* 2003; 63: 4773.
- 5 Friedman HS, Burger PC, Bigner SH, Trojanowski JQ, Wikstrand CJ, Halperin EC, et al. Establishment and Characterization of the Human Medulloblastoma Cell Line and Transplantable Xenograft D283 Med. *Journal of Neuropathology & Experimental Neurology* 1985; 44: 592-605.
- 6 Schramm A, Eggert A, Speleman F, Deubzer HE, Schulte JH, De Preter K, et al. Pharmacological activation of the p53 pathway by nutlin-3 exerts anti-tumoral effects in medulloblastomas. *Neuro-Oncology* 2012; 14: 859-69.
- 7 Friedman HS, Burger PC, Bigner SH, Trojanowski JQ, Brodeur GM, He X, et al. Phenotypic and Genotypic Analysis of a Human Medulloblastoma Cell Line and Transplantable Xenograft (D341 Med) Demonstrating Amplification of *c-myc*. *The American Journal of Pathology* 1988; 130: 472-84.
- 8 Lacroix J, Schlund F, Leuchs B, Adolph K, Sturm D, Bender S, et al. Oncolytic effects of parvovirus H-1 in medulloblastoma are associated with repression of master regulators of early neurogenesis. *International Journal of Cancer* 2014; 134: 703-16.
- 9 Northcott PA, Shih DJH, Peacock J, Garzia L, Sorana Morrissy A, Zichner T, et al. Subgroup-specific structural variation across 1,000 medulloblastoma genomes. *Nature* 2012; 488: 49-56.
- 10 Langdon JA, Lamont JM, Scott DK, Dyer S, Prebble E, Bown N, et al. Combined genome-wide allelotyping and copy number analysis identify frequent genetic losses without copy number reduction in medulloblastoma. *Genes Chromosomes Cancer* 2006; 45: 47-60.
- 11 Lindsey JC, Lusher ME, Anderton JA, Bailey S, Gilbertson RJ, Pearson ADJ, et al. Identification of tumour-specific epigenetic events in medulloblastoma development by hypermethylation profiling. *Carcinogenesis* 2004; 25: 661-68.
- 12 Dietl S, Schwinn S, Dietl S, Riedel S, Deinlein F, Rutkowski S, et al. MB3W1 is an orthotopic xenograft model for anaplastic medulloblastoma displaying cancer stem cell- and Group 3-properties. *BMC Cancer* 2016; 16: 115.
- 13 Bandopadhyay P, Bergthold G, Nguyen B, Schubert S, Gholamin S, Tang Y, et al. BET Bromodomain Inhibition of *MYC*-Amplified Medulloblastoma. *Clinical Cancer Research* 2014; 20: 912-25.
- 14 Milde T, Lodrini M, Savelyeva L, Korshunov A, Kool M, Brueckner LM, et al. HD-MB03 is a novel Group 3 medulloblastoma model demonstrating sensitivity to histone deacetylase inhibitor treatment. *J Neurooncol* 2012; 110: 335-48.
- 15 Xu J, Erdreich-Epstein A, Gonzalez-Gomez I, Melendez EY, Smbatyan G, Moats RA, et al. Novel cell lines established from pediatric brain tumors. *Journal of Neuro-Oncology* 2012; 107: 269-80.
- 16 Erdreich-Epstein A, Robison N, Ren X, Zhou H, Xu J, Davidson TB, et al. *PID1* (*NYGGF4*), a new growth-inhibitory gene in embryonal brain tumors and gliomas. *Clinical cancer research* 2014; 20: 827-36.
- 17 Jacobsen PF, Jenkyn DJ, Papadimitriou JM. Establishment of a Human Medulloblastoma Cell Line and Its Heterotransplantation into Nude Mice. *Journal of Neuropathology & Experimental Neurology* 1985; 44: 472-85.
- 18 Yamada M, Shimizu K, Tamura K, Okamoto Y, Matsui Y, Moriuchi S, et al. Establishment and biological characterization of human medulloblastoma cell lines. *No to shinkei* 1989; 41: 695-702.
- 19 Keles GE, Berger MS, Srinivasan J, Kolstoe DD, Bobola MS, Silber JR. Establishment and characterization of four human medulloblastoma-derived cell lines. *Oncol Res* 1995; 7: 493-503.
- 20 D'cunja J, Shalaby T, Rivera P, von Büren A, Patti R, Heppner FL, et al. Antisense treatment of IGF-IR induces apoptosis and enhances chemosensitivity in central nervous system atypical teratoid/rhabdoid tumours cells. *European Journal of Cancer* 2007; 43: 1581-89.
- 21 Xu J, Margol A, Asgharazadeh S, Erdreich-Epstein A. Pediatric brain tumor cell lines. *J Cell Biochem* 2015; 116: 218-24.
- 22 Izumu I, Mineura K, Watanabe K, Kowada M. Characterization and chemosensitivity of two cell lines derived from human glioblastomas. *Journal of Neuro-Oncology* 1993; 17: 111-21.

- 23 Diserens AC, de Tribolet N, Martin-Achard A, Gaide AC, Schnegg JF, Carrel S. Characterization of an established human malignant glioma cell line: LN-18. *Acta Neuropathol* 1981; 53: 21-8.
- 24 Studer A, de Tribolet N, Diserens AC, Gaide AC, Matthieu JM, Carrel S, et al. Characterization of four human malignant glioma cell lines. *Acta Neuropathol* 1985; 66: 208-17.
- 25 Houghton PJ, Cheshire PJ, Hallman JD, Lutz L, Friedman HS, Danks MK, et al. Efficacy of topoisomerase I inhibitors, topotecan and irinotecan, administered at low dose levels in protracted schedules to mice bearing xenografts of human tumors. *Cancer Chemotherapy and Pharmacology* 1995; 36: 393-403.
- 26 Stein GH. T98G: An anchorage-independent human tumor cell line that exhibits stationary phase G1 arrest in vitro. *Journal of Cellular Physiology* 1979; 99.
- 27 Collins VP. Cultured human glial and glioma cells. *Int Rev Exp Pathol* 1983; 24: 135-202.
- 28 Beckman G, Beckman L, Pontén J, Westermark B. G-6-PD and PGM phenotypes of 16 continuous human tumor cell lines. Evidence against cross-contamination and contamination by HeLa cells. *Hum Hered* 1971; 21: 238-41.
- 29 Pontén J, Macintyre EH. Long term culture of normal and neoplastic human glia. *Acta Pathologica Microbiologica Scandinavica* 1968; 74: 465-86.
