# Supplementary material for: Tacedinaline (CI-994), a class I HDAC inhibitor, targets intrinsic tumor growth and leptomeningeal dissemination in MYC-driven medulloblastoma while making them susceptible to anti-CD47-induced macrophage phagocytosis via NF-kB-TGM2 driven tumor inflammation
Source: PubMed Central journal article supplement — J Immunother Cancer. 2023 Jan 10;11(1):e005871. doi: 10.1136/jitc-2022-005871 (PMC9843227; doi:10.1136/jitc-2022-005871), 2023-01-10
Supplement: jitc-2022-005871supp002.pdf [file jitc-2022-005871supp002.pdf]

**Supplementary Table 2: Overview of culture conditions.**

| Cell line                      | Medium                                                                                                                                                                      | Cells/well |
|--------------------------------|-----------------------------------------------------------------------------------------------------------------------------------------------------------------------------|------------|
| CHLA-01-MED                    | DMEM/F-12, 2 % B-27 supplement, 20 ng/mL EGF, 20 ng/mL FGF                                                                                                                  | 10000      |
| CHLA-01R-MED                   | DMEM/F-12, 2 % B-27 supplement, 20 ng/mL EGF, 20 ng/mL FGF                                                                                                                  | 10000      |
| D283 MED                       | MEM, 10 % FBS, 1 % P/S,                                                                                                                                                     | 5000       |
| D341 MED                       | MEM, 20 % FBS                                                                                                                                                               | 5000       |
| D425 MED                       | Modified IMEM, 10 % FBS, 1 % P/S                                                                                                                                            | 2500       |
| D425 MED (for <i>in vivo</i> ) | 1:1 DMEM/F-12 and Neural Basal Medium A, 1 % P/S, 1 % L-Glutamine, 1 mM Sodium pyruvate, 0.025 mM HEPES 1 % MEM NEAA 2 % B-27, 10 ng/mL EGF, FGF and LIF, 0.4 mg/mL Heparin | -          |
| MED8A                          | DMEM, 10 % FBS, 1 % P/S                                                                                                                                                     | 2000       |
| MED8A (for <i>in vivo</i> )    | DMEM, 10 % FBS, 1 % P/S, 1 % Glutamax                                                                                                                                       | -          |
| HD-MB03                        | RPMI 1640, 10 % FBS, 1 % MEM NEAA                                                                                                                                           | 4000       |
| MB3W1                          | DMEM/F-12, 0.4 % P/S, 2 % B-27, 1 % MEM Vitamin, 20 ng/mL EGF and FGF                                                                                                       | 4000       |
| MB002                          | 1:1 DMEM/F-12 and Neural Basal Medium A, 1 % P/S, 1 % L-Glutamine, 1 mM Sodium pyruvate, 0.025 mM HEPES 1 % MEM NEAA 2 % B-27, 10 ng/mL EGF, FGF and LIF, 0.4 mg/mL Heparin | 10000      |
| CHLA-259                       | IMDM, 20 % FBS, 1x IST                                                                                                                                                      | 9000       |
| Daoy                           | DMEM, 10 % FBS, 1 % P/S                                                                                                                                                     | 1000       |
| ONS76                          | DMEM, 10 % FBS, 1 % P/S                                                                                                                                                     | 1000       |
| UW-228-2                       | DMEM, 10 % FBS, 1 % P/S                                                                                                                                                     | 750        |
| UW-228-3                       | DMEM, 10 % FBS, 1 % P/S                                                                                                                                                     | 1000       |
| ATRT13808                      | 1:1 DMEM/F-12 and Neural Basal Medium A, 1 % P/S, 1 % L-Glutamine, 1 mM Sodium pyruvate, 0.025 mM HEPES 1 % MEM NEAA 2 % B-27, 10 ng/mL EGF, FGF and LIF, 0.4 mg/mL Heparin | 3500       |
| BT-12                          | IMDM, 20 % FBS, 1x IST                                                                                                                                                      | 1500       |
| BT-16                          | IMDM, 20 % FBS, 1x IST                                                                                                                                                      | 3500       |
| CHLA-02-ATRT                   | DMEM/F-12, 2 % B-27 supplement, 20 ng/mL EGF, 20 ng/mL FGF                                                                                                                  | 5000       |
| CHLA-04-ATRT                   | DMEM/F-12, 2 % B-27 supplement, 20 ng/mL EGF, 20 ng/mL FGF                                                                                                                  | 4000       |
| CHLA-05-ATRT                   | DMEM/F-12, 2 % B-27 supplement, 20 ng/mL EGF, 20 ng/mL FGF                                                                                                                  | 9000       |
| CHLA-06-ATRT                   | DMEM/F-12, 2 % B-27 supplement, 20 ng/mL EGF, 20 ng/mL FGF                                                                                                                  | 6500       |
| CHLA-266                       | IMDM, 20 % FBS, 1x IST                                                                                                                                                      | 4000       |
| HHU-ATRT-01                    | Neurocult medium, 1 % L-Glutamine, 1 % P/S, 75 µg/mL BSA, 1 % N-2 supplement, 2 % B-27 supplement, 10 ng/mL EGF, 10 ng/mL FGF, Heparin                                      | 3500       |
| JC-ATRT                        | 1:1 DMEM/F-12 and Neural Basal Medium A, 1 % P/S, 1 % L-Glutamine, 1 mM Sodium pyruvate, 0.025 mM HEPES 1 % MEM NEAA 2 % B-27, 10 ng/mL EGF, FGF and LIF, 0.4 mg/mL Heparin | 7000       |
| VU397                          | 1:1 DMEM/F-12 and Neural Basal Medium A, 1 % P/S, 1 % L-Glutamine, 1 mM Sodium pyruvate, 0.025 mM HEPES 1 % MEM NEAA 2 % B-27, 10 ng/mL EGF, FGF and LIF, 0.4 mg/mL Heparin | 4500       |
| AM-38                          | MEM, 20 % FBS, 1 % L-Glutamine                                                                                                                                              | 4000       |
| LN-18                          | DMEM, 10 % FBS, 1 % P/S                                                                                                                                                     | 1250       |
| LN-308                         | DMEM, 10 % FBS, 1 % P/S                                                                                                                                                     | 1750       |
| LN-229                         | DMEM, 10 % FBS, 1 % P/S                                                                                                                                                     | 1000       |
| SJ-GBM2                        | IMDM, 20 % FBS, 1x IST                                                                                                                                                      | 1500       |
| T98G                           | DMEM, 10 % FBS, 1 % P/S                                                                                                                                                     | 1250       |
| TP365MG                        | DMEM, 10 % FBS, 1 % P/S                                                                                                                                                     | 1250       |
| U138MG                         | DMEM, 10 % FBS, 1 % P/S                                                                                                                                                     | 3000       |

|        |                               |      |
|--------|-------------------------------|------|
| U251MG | DMEM, 10 % FBS, 1 % P/S       | 1250 |
| U87MG  | DMEM, 10 % FBS, 1 % P/S       | 2000 |
| YH-13  | MEM, 20 %FBS, 1 % L-Glutamine | 4000 |

Gibco DMEM (#31966-021); DMEM/F-12 (#11320-033); MEM (#10370-047); Modified IMEM (#A10489-01); RPMI (#31870-025); IMDM (#12440-061); Neurobasal-A Medium (#10888022) B-27 supplement, minus vitamin A (#12587010); L-Glutamine (#25030-024); MEM Vitamin Solution (#11120037); MEM Non-Essential Amino Acid (NEAA) Solution (#1140-035); Sodium bicarbonate (#25080-094); Sodium pyruvate (#11360-070); HEPES (#15630-080) BSA Fraction V (7.5 % solution) (#15260-037); Insulin-Transferrin-Selenium (IST) (#41400-045); N-2 supplement (#17502048); EGF Human Recombinant Protein (#PHG0311) was purchased from Thermo Fisher. NeuroCult NS-A Basal Medium (Human) (#05750) and Heparin Solution (0.2 %) (#07980) were purchased from Stemcell Technologies (Köln, Germany). Penicillin-Streptomycin (P/S) (#P4333) and heat inactivated Fetal Bovine Serum (FBS) (#F9665) were purchased from Sigma-Aldrich. Fibroblast Growth Factor basic, human recombinan) was purchased from biomol (#50361.50, Hamburg, Germany). Leukemia Inhibitory Factor human (#LIF1010) was purchased from Millipore.
