# Supplementary material for: Tacedinaline (CI-994), a class I HDAC inhibitor, targets intrinsic tumor growth and leptomeningeal dissemination in MYC-driven medulloblastoma while making them susceptible to anti-CD47-induced macrophage phagocytosis via NF-kB-TGM2 driven tumor inflammation
Source: PubMed Central journal article supplement — J Immunother Cancer. 2023 Jan 10;11(1):e005871. doi: 10.1136/jitc-2022-005871 (PMC9843227; doi:10.1136/jitc-2022-005871), 2023-01-10
Supplement: jitc-2022-005871supp006.pdf [file jitc-2022-005871supp006.pdf]

**Supplementary Table 6:** PCR primers for MYC.

|             |                                   |
|-------------|-----------------------------------|
| cMyc-LeGo-1 | ggcagGGATCCGAGCCACCATGCCCTCAACGTT |
| cMyc-LeGo-2 | ggcagGAATTCGAACAAACGACCCAACACCCG  |
