# Supplementary material for: Tacedinaline (CI-994), a class I HDAC inhibitor, targets intrinsic tumor growth and leptomeningeal dissemination in MYC-driven medulloblastoma while making them susceptible to anti-CD47-induced macrophage phagocytosis via NF-kB-TGM2 driven tumor inflammation
Source: PubMed Central journal article supplement — J Immunother Cancer. 2023 Jan 10;11(1):e005871. doi: 10.1136/jitc-2022-005871 (PMC9843227; doi:10.1136/jitc-2022-005871), 2023-01-10
Supplement: jitc-2022-005871supp013.pdf [file jitc-2022-005871supp013.pdf]

1 **Supplementary Figure 1. Selectively active epigenetic regulators in glioblastoma cells**  
2 **compared to other brain tumor entities.** The G9a methyltransferase inhibitors UNC  
3 0638, UNC 0642, and UNC 06446 were highly selective for glioblastomas (GBM)  
4 compared to the other tested entities (medulloblastoma (MB) and atypical  
5 teratoid/rhabdoid tumors (AT/RT)). The previously described inhibitor BIX 01294  
6 showed no selectivity for GBM in our cross-entity screen. \*,  $p < 0.05$ ; \*\*,  $p < 0.01$ ; \*\*\*,  
7  $p < 0.001$ .

8  
9 **Supplementary Figure 2. Selectively active epigenetic regulators in atypical teratoid**  
10 **/rhabdoid tumor cells compared to other brain tumor entities.** The DNA  
11 methyltransferase inhibitors 5-azacytidine and fisetin, as well as the jumonji inhibitor  
12 GSKJ4, were selectively active in atypical teratoid / rhabdoid tumors (AT/RT) compared  
13 to the other tested entities (medulloblastoma (MB) and glioblastoma (GBM)). \*,  $p < 0.05$ ;  
14 \*\*,  $p < 0.01$ ; \*\*\*,  $p < 0.001$ .

15  
16 **Supplementary Figure 3. The preferential anti-tumoral activity of HDACi in MYC-**  
17 **driven medulloblastoma cells.** Dot plot demonstrating MYC-dependent preferential anti-  
18 tumoral activity of HDACi when medulloblastoma (MB) *in vitro* models were subdivided  
19 according to *MYC* status \*\*,  $p < 0.01$ .

20  
21 **Supplementary Figure 4. In-Vitro Safety Profile of CI994.** In order to evaluate the  
22 potential safety profile of CI994 IC50 was evaluated for various normal or non-malignant  
23 cells. (A) Human fetal fibroblasts had significantly higher IC50 compared to Grp3-MB  
24 cells. (B) Cell viability was evaluated for normal human astrocytes (NHA) and mouse  
25 neonatal cortical neurons.

26

27 **Supplementary Figure 5. In vivo analysis of changes in protein expression after**  
28 **CI994 treatment.** Mice injected with D425 tumor cells expressing BFP-Luciferase were  
29 treated with CI994 as in figure 3, brain dissected out and regions of tumor isolated under a  
30 fluorescence stereo scope. Tumors were dissociated into single cell suspensions and  
31 prepped for permeabilized with saponin and stained with anti-mouse CD45, anti-TGM2,  
32 anti-cMYC and anti-KI67. Tumor cells were identified as being msCD45-BFP+. Increase  
33 in cells expressing TGM2 (A) after CI994 treatment was observed while a significant  
34 decrease in MYC and Ki67 was observed (n=5 mice each)  
35
