# Supplementary figures and images for: Tacedinaline (CI-994), a class I HDAC inhibitor, targets intrinsic tumor growth and leptomeningeal dissemination in MYC-driven medulloblastoma while making them susceptible to anti-CD47-induced macrophage phagocytosis via NF-kB-TGM2 driven tumor inflammation
Source: PubMed Central journal article supplement — J Immunother Cancer. 2023 Jan 10;11(1):e005871. doi: 10.1136/jitc-2022-005871 (PMC9843227; doi:10.1136/jitc-2022-005871), 2023-01-10

## Supplementary Figure 2

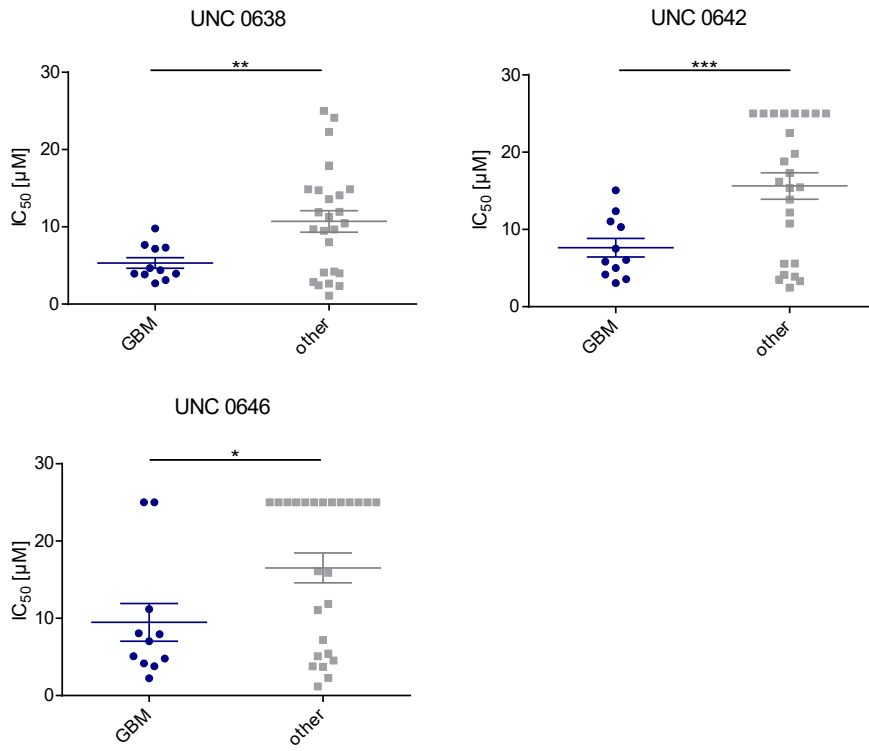

Supplement: jitc-2022-005871supp009.pdf [file jitc-2022-005871supp009.pdf]

## Supplementary Figure 3

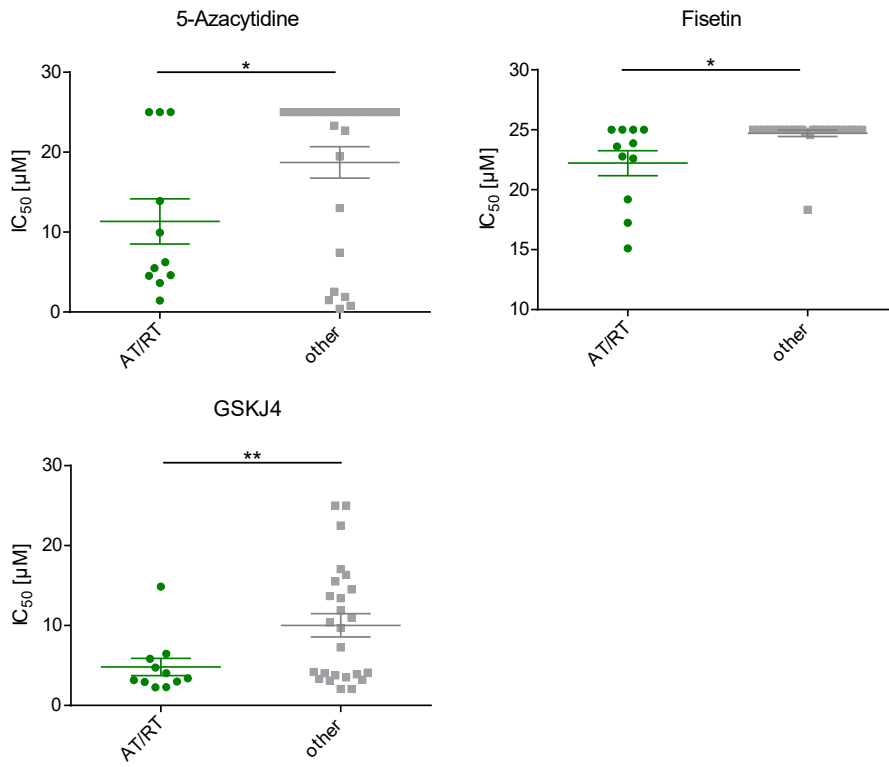

Supplement: jitc-2022-005871supp010.pdf [file jitc-2022-005871supp010.pdf]

## Supplementary Figure 4

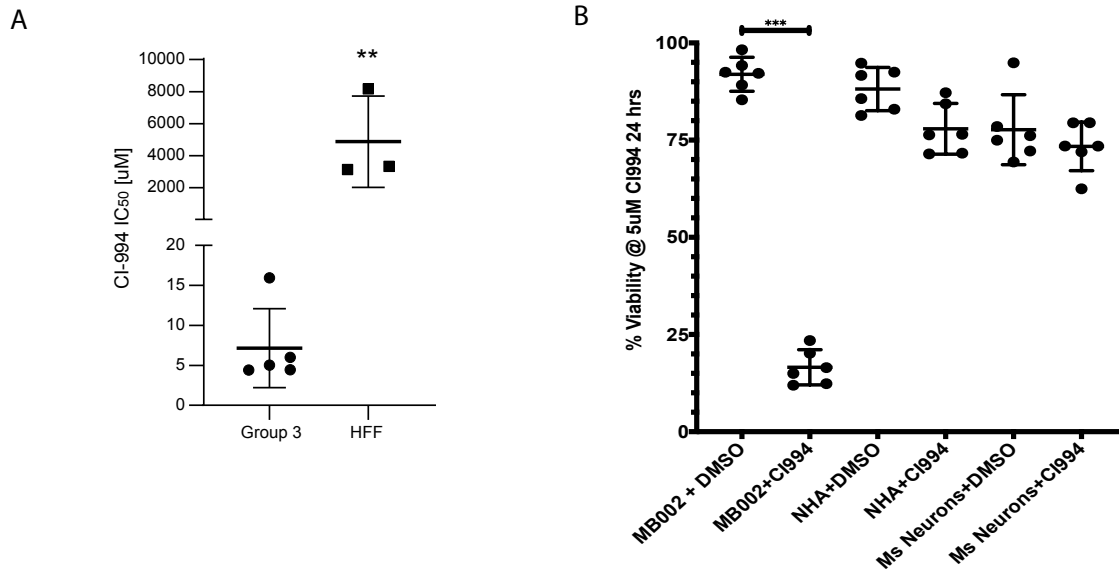

Supplement: jitc-2022-005871supp011.pdf [file jitc-2022-005871supp011.pdf]

Supplementary Figure 5

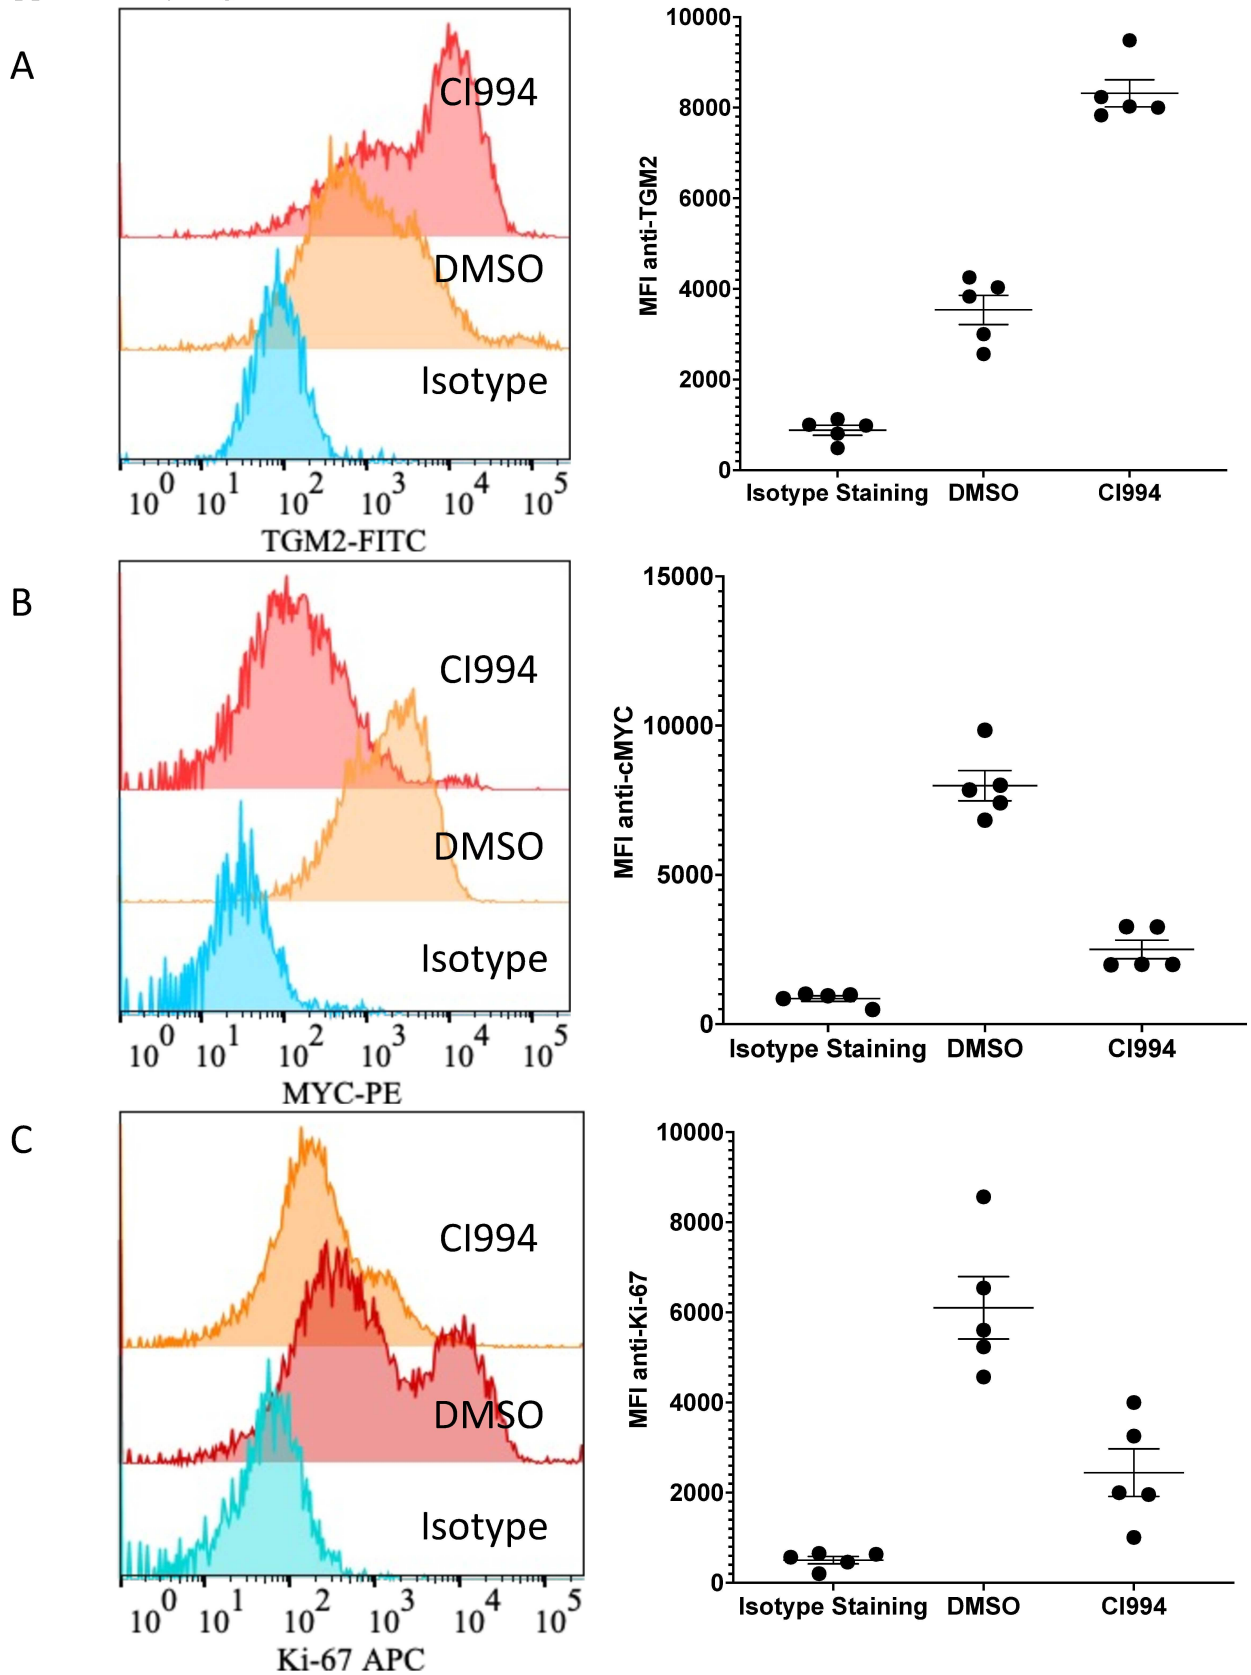

Supplement: jitc-2022-005871supp012.pdf [file jitc-2022-005871supp012.pdf]
